# Supplementary material for: A thorough spectroscopic study of luminescent precursor solution of Y3Al5O12:Tb3+: influence of acetylacetone
Source: Royal Society of Chemistry journal article supplement (doi:10.1039/c6ra06444b), 2016-01-01
Supplement: c6ra06444b1.pdf [file c6ra06444b1.pdf]

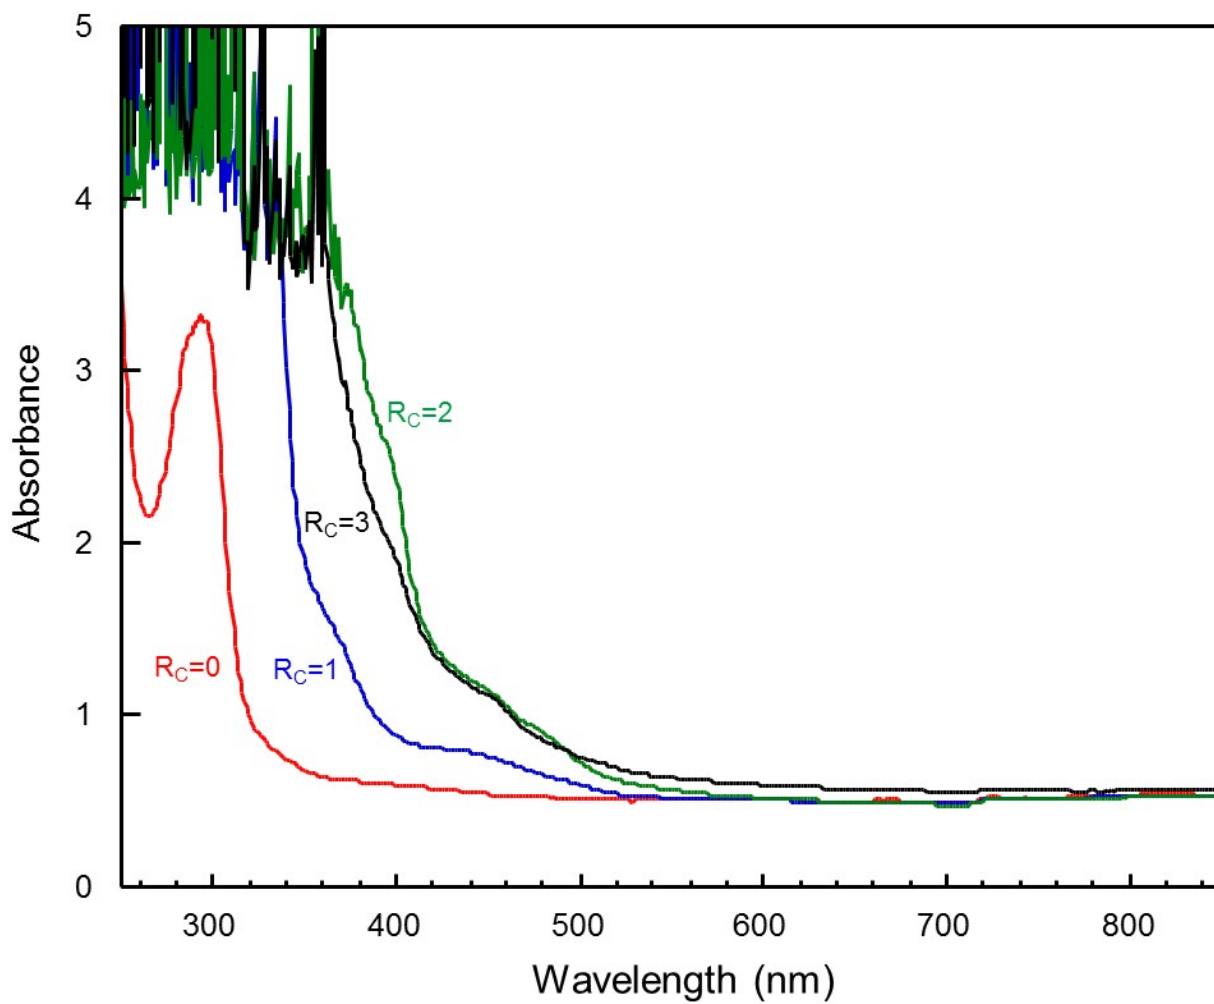

Fig. S1 : Absorbance spectra of the precursor solutions

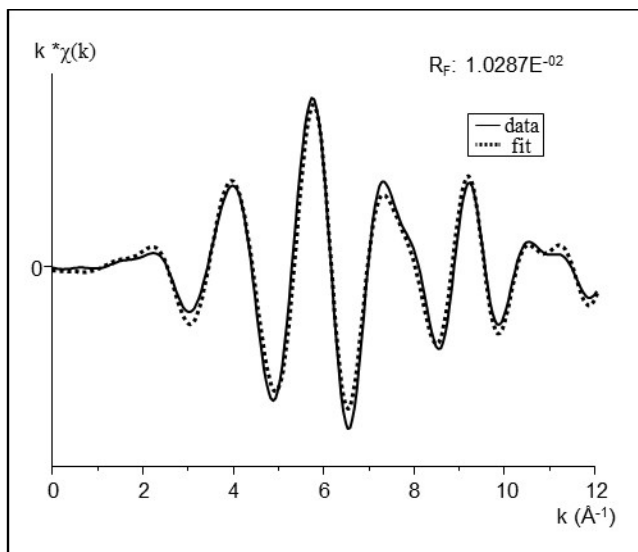

Fig. S2: Experimental (solid line) and fitted (dot line) two first-shell filtered EXAFS spectra at Y K-edge for stabilized acac-modified sol ( $R_C=1$ )

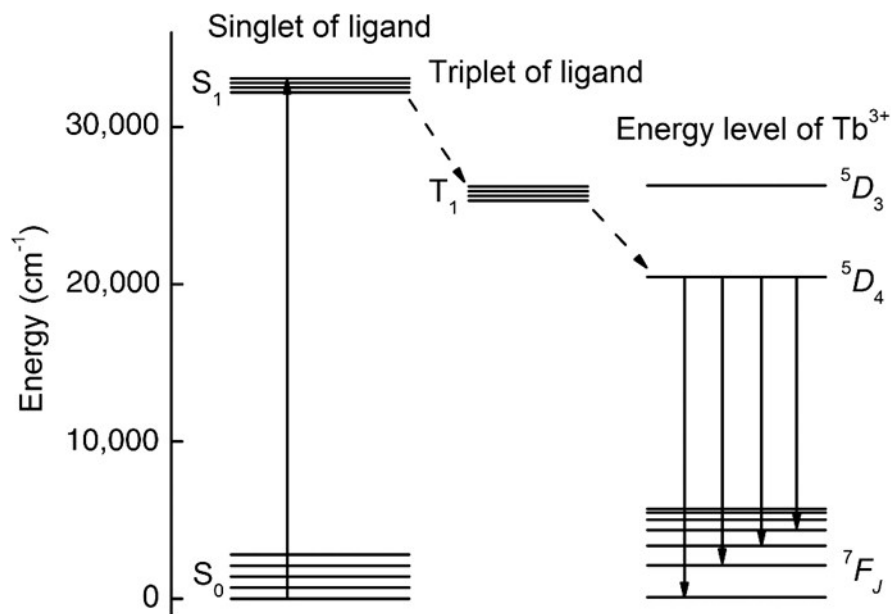

Fig. S3: General scheme representing the energy transfer from a ligand to  $Tb^{3+}$  ions, evidencing the antenna effect

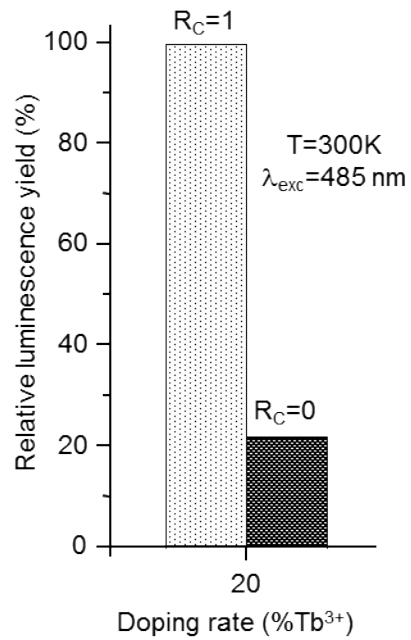

Fig. S4: Comparison of relative luminescence yields determined under blue excitation for Tb-doped sols between an acac-modified sol and an unmodified one.
